# Supplementary material for: Formaldehyde Hydroformylation over a Heterogeneous Catalyst Based on Functionalized Rh-biphosphine Unit: A Combined Experiment and Theoretical Study
Source: Research Square preprint supplement (doi:10.21203/rs.3.rs-8468555/v1), 2026-01-08
Supplement: Supplementary file 1 [file a3f777f6b6d43a205944aa4d.docx]

**Formaldehyde Hydroformylation over a Heterogeneous Catalyst Based on Functionalized Rh-biphosphine Unit: A Combined Experiment and Theoretical Study**

Yuntao He,a,b Wanting Xia,a Luyang Qiao,a Zongkai Wu,a,c Xinyi Cao,a Yong Gao,d Jiankai Cheng,a,* Zhangfeng Zhou,a,* Yuangen Yaoa

[a] State Key Laboratory of Structural Chemistry, Fujian Institute of Research on the Structure of Matter, Chinese Academy of Sciences, Fuzhou 350002, China

[b] University of Chinese Academy of Sciences, Beijing 100049, China

[c] College of Chemistry and Materials Science, Fujian Normal University, Fuzhou 350007, China

[d] Shaanxi Key Laboratory of Low Metamorphic Coal Clean Utilization, School of Chemistry and Chemical Engineering, Yulin University, Yulin 719000, China

**Corresponding authors:**

Jiankai Cheng, Email: cjk@fjirsm.ac.cn

Zhangfeng Zhou, Email: zfzhou@fjirsm.ac.cn


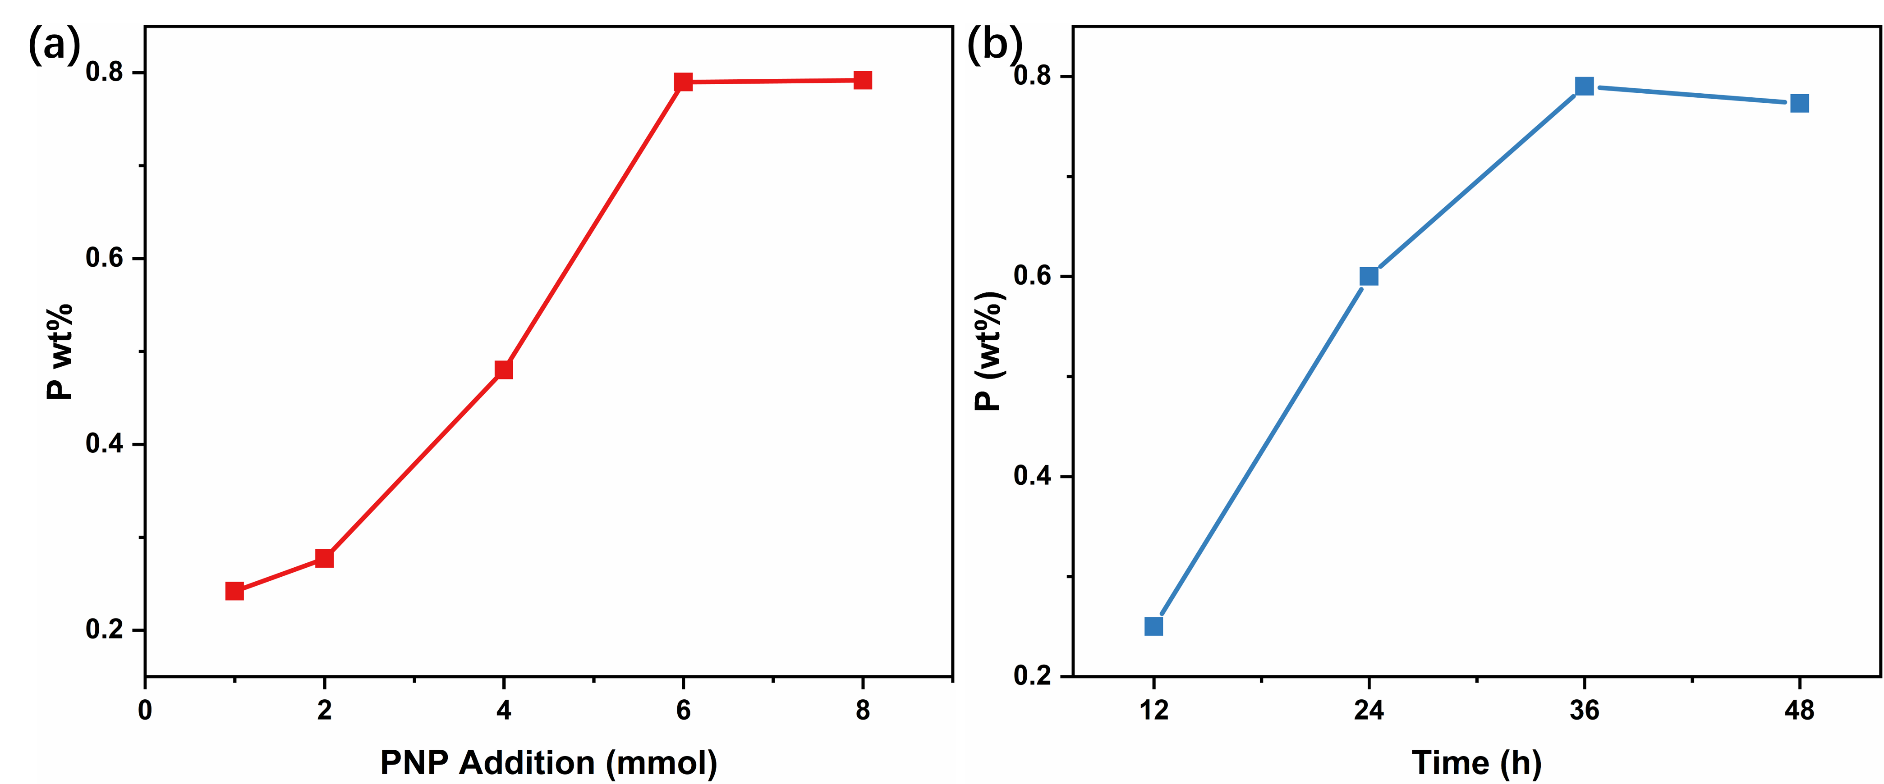


**Fig. S1.** Mass fraction of P in PNP under different (a) PNP addition amounts and (b) reaction times.


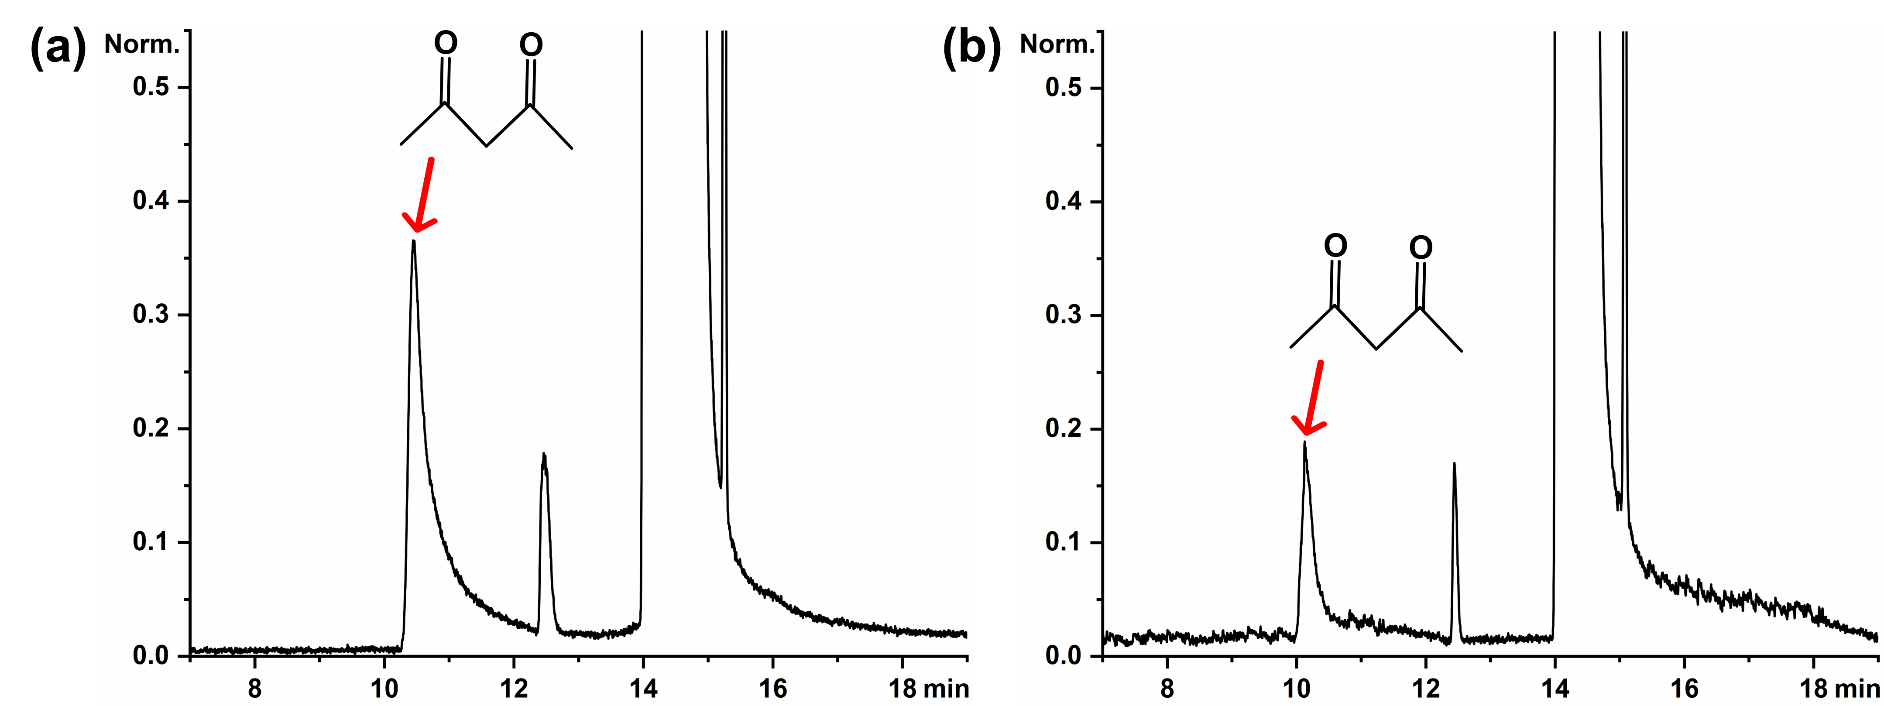


**Fig. S2.** Mass spectra of the filtrate after loading rhodium species (a) Rh/PS-SG and (b) Rh/PS-N2.





**Fig. S3.** XRD patterns of supports and catalysts.





**Fig. S4.** Differential thermogravimetric image of SiO2, Cl-SiO2 and PNP-SiO2.





**Fig. S5.** N 1s XPS of PNP-SiO2, Rh/PS-SG and Rh/PS-N2.





**Fig. S6.** Recycling performance of Rh/PS-SG. Reaction condition: [Rh] = 0.8 mmol/L, VDMA = 25 mL, n(FA): n(Rh) = 1200, T = 95 ℃, P = 12 MPa, n(CO): n(H2) = 1; t = 3 h.


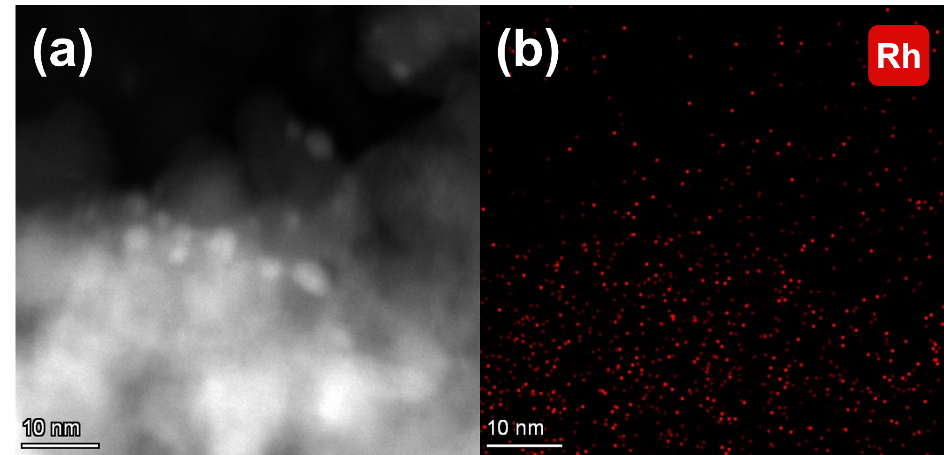


**Fig. S7.** HRTEM and mapping images of (a)(b) Rh/PS-SG-Used

**Table S1.** The deconvolution analysis results of Rh 3d XPS profiles of Rh/PS-SG and Rh/PS-N2.

| **Catalyst** | **Rh+ (%)** | **Rh0 (%)** |
| --- | --- | --- |
| Rh/PS-SG | 54.9 | 45.1 |
| Rh/PS-N2 | 58.1 | 41.9 |

**Table S2.** The Rh content of Rh/PS-SG and Rh/PS-N2 before and after reaction.

| **Catalyst** | **aRh (wt%)** |
| --- | --- |
| Rh/PS-SG-Fresh | 0.39 |
| Rh/PS-SG-Used | 0.36 |
| Rh/PS-N2-Fresh | 0.31 |
| Rh/PS-N2-Used | 0.16 |

a Measured by ICP-OES.

**Table S3.** The catalytic performance in hydroformylation of formaldehyde with different Rh-based solid catalysts.

| **Catalyst** | **Rh loading (%)** | **(g)** | **Conversion of FA (%)** | **Selectivity of GA (%)** | **TOF****GA**  **(****h-1)** | **Ref.** |
| --- | --- | --- | --- | --- | --- | --- |
| aRh/PS-SG | 0.39 | - | 12.5 | 88.3 | 99.6 | This work |
| bRh/Na-Y | 2.91 | 0.785 | 60.1 | 86.6 | 40.3 | 1 |
| cRh@N-SiO2 | 0.78 | 0.785 | 33.1 | 94.7 | 90.8 | 2 |
| dRh@SiO2 | 0.59 | 0.012 | 25.3 | 90.8 | 183.3 | 3 |

a Reaction condition: 0.50 g catalyst, 0.64 g paraformaldehyde (CH2O)n, 25 mL DMA, P = 8 MPa (CO: H2 = 1:1), T = 110 °C, reaction time = 3 h.

b Reaction condition: 1.0 g catalyst, 1.97 g paraformaldehyde (CH2O)n, 25 mL DMA, P = 12 MPa (CO: H2 = 1:1), T = 95 °C, reaction time = 3 h.

c Reaction condition: 1.0 g catalyst, 1.97 g paraformaldehyde (CH2O)n, 25 mL DMA, P = 12 MPa (CO: H2 = 1:1), T = 95 °C, reaction time = 3 h.

d Reaction condition: 0.29 g catalyst, 0.60 g paraformaldehyde (CH2O)n, 20 mL acetonitrile, P = 8 MPa (CO: H2 = 1:1), T = 110 °C, reaction time = 3 h.


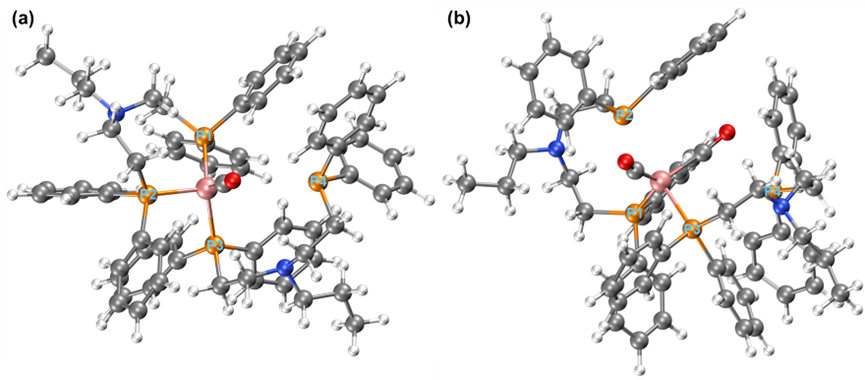


**Fig. S8.** (a) Rh/PS-N2 with one CO coordinated; (b) Rh/PS-N2 with two CO molecules coordinated.

**Table S4.** Rh-P bond lengths (in Å) in Rh/PS-N2 during sequential CO coordination.

| **Structure** | **Rh-P1** | **Rh-P2** | **Rh-P3** | **Rh-P4** |
| --- | --- | --- | --- | --- |
| Rh/PS-N2 | 2.29 | 2.29 | 2.32 | 2.36 |
| Rh/PS-N2 + 1CO | 2.32 | 2.29 | 2.36 | 4.08 |
| Rh/PS-N2 + 2CO | 2.45 | 2.94 | 2.40 | 4.74 |

As shown in Fig. S7, upon binding one CO molecule, the Rh-P4 bond in Rh/PS-N2 significantly elongates to 4.08 Å (Table S3), indicating local structural distortion induced by coordination. When a second CO molecule binds (Fig. S7b), the Rh-P4 bond further breaks up to 4.74 Å, while the Rh-P2 bond markedly extends from 2.29 Å to 2.94 Å. The concurrent weakening of these two Rh-P bonds clearly reveals the stepwise dissociation mechanism of Rh/PS-N2 under multiple coordination stresses.

**Reference**

1. Guo, X. *et al.* Effect of NaY Zeolite at Different Calcination Temperatures on the Activity in Hydroformylation of Formaldehyde. *ChemistrySelect* **7**, (2022).

2. Chen, J. *et al.* Promoted Hydroformylation of Formaldehyde By Electronic Metal–Support Interactions in N-Group Functionalized Silica Supported Rhodium Catalyst. *Catal. Lett.* **151**, 3664–3674 (2021).

3. Yang, Q. *et al.* Unravelling structure sensitivity in heterogeneous hydroformylation of aldehyde over Rh. *Chem. Eng. J.* **481**, 148529 (2024).
